# Supplementary material for: Regulated Degradation of the HIV-1 Vpu Protein through a βTrCP-Independent Pathway Limits the Release of Viral Particles
Source: PubMed Central journal article supplement (PMC1933454; doi:10.1371/journal.ppat.0030104), 2007-07-27

A

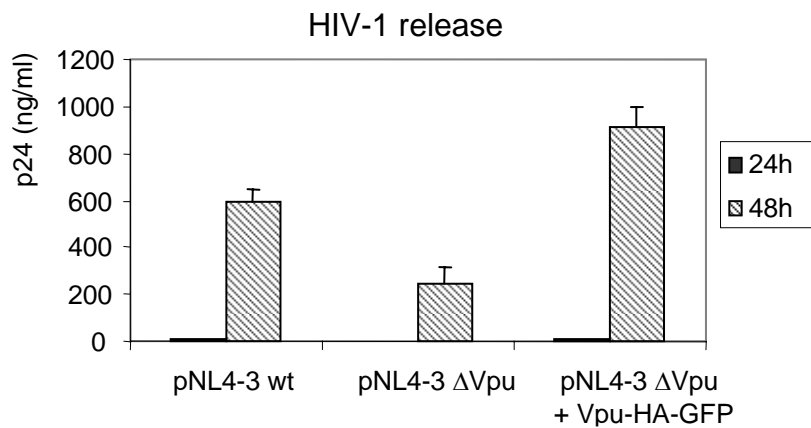

B

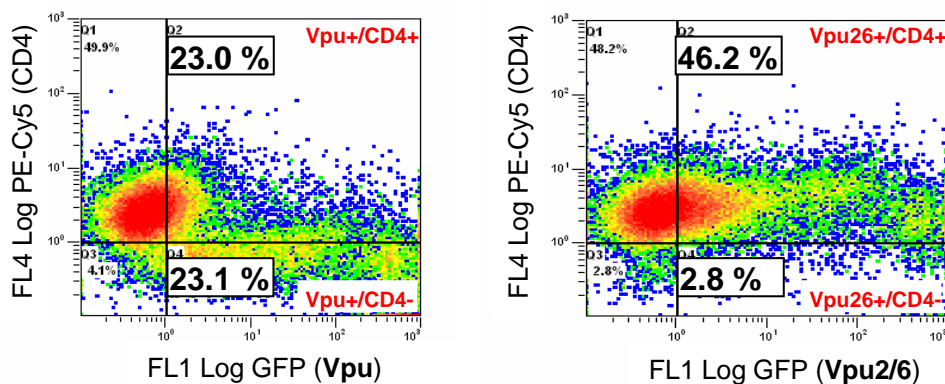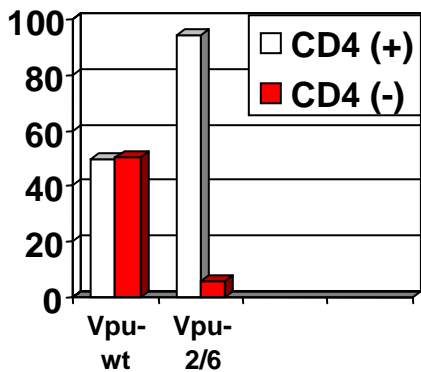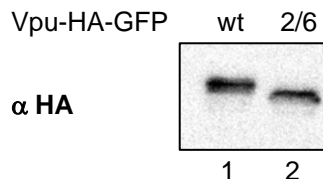

Supplement: ppat.0030104.sg001.pdf [file ppat.0030104.sg001.pdf]
